# Supplementary material for: The Effect of Spring Barley Fertilization on the Content of Polycyclic Aromatic Hydrocarbons, Microbial Counts and Enzymatic Activity in Soil
Source: MDPI journal article supplement (doi:10.3390/ijerph20053796), 2023-02-21
Supplement: s1 [file s1]

**Table S1.** Dates of agricultural operations in the production of spring barley.

| <b>Agricultural operation</b>                                                           | <b>Date</b>     |
|-----------------------------------------------------------------------------------------|-----------------|
| Fall plowing                                                                            | 27 October 2014 |
| Cultivation unit, harrow                                                                | 20 March 2015   |
| NPK fertilization (according to plan), cultivation unit, harrow                         | 21 March 2015   |
| Sowing of spring barley cv. Olof at 350 seeds m <sup>-2</sup> - 164 kg ha <sup>-1</sup> | 24 March 2015   |
| Application of Mustang herbicide, 0.5 l ha <sup>-1</sup>                                | 11 May 2015     |
| Top dressing with ammonium nitrate (34% N) (according to plan)                          | 22 May 2015     |
| Application of Decis Mega 50 EW pesticide, 0.1 l ha <sup>-1</sup> (cereal leaf beetle)  | 10 June 2015    |
| Harvest with a plot harvester                                                           | 5 August 2015   |

**Table S2.** Phenological growth stages of spring barley cv. Olof.

| <b>Growth stage</b> | <b>Date</b>   |
|---------------------|---------------|
| BBCH 10             | 15 April 2015 |
| BBCH 16             | 20 April 2015 |
| BBCH 20             | 4 May 2015    |
| BBCH 25             | 9 May 2015    |
| BBCH 30             | 20 May 2015   |
| BBCH 35             | 23 May 2015   |
| BBCH 51             | 8 June 2015   |
| BBCH 55             | 12 June 2015  |
| BBCH 61             | 14 June 2015  |
| BBCH 65             | 17 June 2015  |
| BBCH 69             | 19 June 2015  |
| BBCH 73             | 11 July 2015  |
| BBCH 75             | 15 July 2015  |
| BBCH 81             | 19 July 2015  |
| BBCH 85             | 23 July 2015  |

BBCH 87

27 July 2015

BBCH 89

30 July 2015

**Table S3.** Mean daily temperature and total precipitation in the study area in 2015.

| Day              | Month |      |       |       |      |      |      |      |      |      |      |      |
|------------------|-------|------|-------|-------|------|------|------|------|------|------|------|------|
|                  | Jan   | Feb  | March | April | May  | June | July | Aug  | Sept | Oct  | Nov  | Dec  |
| Temperature (°C) |       |      |       |       |      |      |      |      |      |      |      |      |
| 1                | 1.1   | -0.9 | 3.8   | 3.0   | 10.2 | 16.6 | 16.8 | 16.5 | 27.5 | 9.7  | 8.2  | 3.0  |
| 2                | 3.1   | -1.4 | 4.8   | 2.5   | 6.5  | 16.4 | 18.2 | 19.4 | 18.4 | 11.3 | 6.1  | 2.6  |
| 3                | 3.0   | -1.0 | 2.4   | 2.6   | 6.8  | 19.8 | 22.2 | 24.0 | 16.9 | 11.2 | 4.6  | 6.2  |
| 4                | 1.5   | -2.2 | 1.2   | 1.7   | 11.8 | 13.4 | 24.7 | 24.4 | 14.2 | 14.6 | 1.5  | 6.2  |
| 5                | -0.4  | -7.4 | -0.5  | 2.2   | 15.2 | 15.4 | 26.1 | 25.4 | 14.8 | 11.1 | 4.2  | 6.1  |
| 6                | -7.8  | -3.3 | 0.1   | 2.9   | 15.2 | 20.8 | 22.5 | 22.7 | 12.3 | 10.4 | 3.1  | 7.4  |
| 7                | -7.3  | -1.5 | 5.8   | 4.1   | 13.1 | 17.2 | 20.0 | 26.7 | 12.0 | 4.7  | 5.3  | 5.6  |
| 8                | -1.2  | -1.0 | 8.9   | 7.6   | 10.7 | 12.2 | 19.4 | 30.2 | 11.2 | 3.8  | 10.9 | 2.6  |
| 9                | 2.3   | -0.4 | 8.3   | 4.8   | 13.9 | 11.8 | 15.8 | 23.1 | 11.4 | 2.1  | 8.0  | 4.4  |
| 10               | 5.7   | 1.2  | 7.3   | 9.4   | 13.4 | 13.6 | 12.8 | 20.8 | 13.4 | 0.1  | 11.1 | 3.4  |
| 11               | 3.8   | 1.0  | 5.4   | 12.0  | 13.0 | 15.7 | 14.5 | 23.0 | 14.2 | 0.7  | 12.6 | 1.1  |
| 12               | 2.8   | 0.5  | 3.5   | 9.7   | 14.7 | 18.2 | 15.4 | 23.7 | 13.7 | 0.7  | 10.7 | 3.5  |
| 13               | 6.6   | -0.7 | 2.3   | 7.4   | 11.4 | 20.2 | 16.3 | 21.4 | 13.8 | 4.4  | 7.0  | 2.2  |
| 14               | 5.0   | 1.0  | 4.7   | 5.4   | 10.1 | 20.3 | 16.3 | 19.4 | 14.6 | 6.6  | 6.5  | 0.0  |
| 15               | 1.1   | -1.3 | 6.2   | 9.3   | 7.9  | 15.1 | 16.1 | 22.9 | 17.2 | 6.8  | 5.3  | -0.4 |
| 16               | 5.5   | -1.8 | 6.8   | 7.7   | 8.7  | 12.0 | 16.3 | 23.5 | 17.2 | 7.8  | 4.2  | -3.3 |
| 17               | 3.6   | -2.6 | 7.2   | 5.8   | 10.8 | 14.9 | 18.0 | 21.6 | 22.1 | 8.9  | 8.5  | 2.9  |
| 18               | -0.2  | -0.5 | 5.1   | 3.6   | 10.6 | 15.5 | 20.6 | 19.2 | 17.7 | 8.8  | 9.2  | 8.4  |
| 19               | -0.3  | 2.1  | 2.3   | 4.5   | 15.9 | 13.1 | 19.0 | 18.1 | 15.2 | 8.2  | 8.8  | 8.9  |
| 20               | -1.1  | 1.6  | 3.7   | 6.2   | 13.2 | 14.3 | 16.5 | 18.4 | 13.5 | 7.1  | 6.5  | 7.7  |
| 21               | 0.4   | 3.7  | 4.9   | 5.9   | 11.5 | 14.7 | 16.9 | 16.9 | 11.3 | 6.2  | 3.9  | 5.8  |
| 22               | -0.9  | 2.2  | -1.3  | 6.3   | 13.6 | 15.7 | 19.8 | 16.1 | 11.4 | 7.4  | 2.5  | 7.4  |
| 23               | -0.3  | 3.2  | 1.9   | 10.3  | 13.2 | 14.2 | 19.6 | 17.7 | 15.3 | 9.6  | 0.1  | 9.6  |
| 24               | -3.3  | 3.3  | 5.2   | 11.1  | 14.0 | 13.7 | 18.6 | 23.0 | 14.2 | 7.4  | -0.2 | 4.5  |
| 25               | -2.9  | 3.1  | 6.2   | 13.6  | 14.4 | 14.7 | 20.8 | 19.7 | 11.8 | 6.9  | -0.9 | 6.1  |
| 26               | -1.3  | 2.9  | 10.9  | 15.2  | 12.6 | 15.8 | 17.3 | 17.5 | 12.0 | 5.6  | 0.0  | 7.2  |
| 27               | -2.2  | 3.7  | 7.0   | 15.6  | 10.7 | 15.5 | 15.2 | 21.6 | 10.3 | 4.0  | 0.9  | 5.9  |
| 28               | 0.2   | 4.5  | 4.8   | 11.0  | 11.6 | 18.2 | 17.4 | 20.5 | 9.8  | 4.6  | -1.0 | 3.4  |
| 29               | 0.4   | -    | 4.6   | 7.6   | 14.3 | 15.9 | 17.1 | 17.1 | 9.2  | 4.8  | 2.3  | -2.8 |
| 30               | -0.2  | -    | 6.7   | 7.4   | 14.5 | 16.7 | 14.3 | 20.9 | 10.3 | 5.1  | 4.4  | -4.2 |
| 31               | 0.6   | -    | 3.1   | -     | 12.2 | -    | 14.1 | 23.7 | -    | 4.9  | -    | -3.9 |

|                    |     |     |     |     |      |      |      |      |      |     |     |     |
|--------------------|-----|-----|-----|-----|------|------|------|------|------|-----|-----|-----|
| Monthly<br>average | 0.6 | 0.3 | 4.6 | 7.2 | 12.1 | 15.7 | 18.0 | 21.3 | 14.2 | 6.6 | 5.1 | 3.8 |
|--------------------|-----|-----|-----|-----|------|------|------|------|------|-----|-----|-----|

Table S3 continued

| Day                | Month |     |       |       |      |      |      |     |      |      |      |      |
|--------------------|-------|-----|-------|-------|------|------|------|-----|------|------|------|------|
|                    | Jan   | Feb | March | April | May  | June | July | Aug | Sept | Oct  | Nov  | Dec  |
| Precipitation (mm) |       |     |       |       |      |      |      |     |      |      |      |      |
| 1                  | 0.0   | 0.0 | 0.0   | 0.0   | 4.8  | 0.1  | 0.0  | 0.0 | 3.0  | 0.0  | 0.0  | 2.5  |
| 2                  | 0.0   | 0.0 | 9.0   | 2.5   | 0.0  | 0.0  | 0.0  | 0.0 | 0.0  | 0.0  | 0.0  | 3.6  |
| 3                  | 0.0   | 3.6 | 4.2   | 0.0   | 0.0  | 0.0  | 0.0  | 0.0 | 0.0  | 0.0  | 0.0  | 2.2  |
| 4                  | 0.0   | 0.0 | 3.0   | 3.2   | 0.8  | 0.0  | 0.0  | 0.0 | 0.0  | 0.0  | 0.0  | 1.0  |
| 5                  | 0.1   | 0.0 | 2.0   | 2.2   | 1.5  | 0.0  | 0.0  | 0.0 | 0.0  | 0.0  | 0.0  | 0.0  |
| 6                  | 0.0   | 0.0 | 1.0   | 0.0   | 0.0  | 0.0  | 0.6  | 0.0 | 23.0 | 0.0  | 9.6  | 0.0  |
| 7                  | 1.5   | 1.0 | 0.0   | 0.2   | 0.0  | 0.0  | 0.2  | 0.0 | 13.0 | 0.0  | 6.5  | 0.0  |
| 8                  | 9.5   | 1.1 | 0.0   | 0.0   | 0.0  | 0.0  | 5.5  | 2.0 | 4.0  | 0.0  | 0.0  | 0.0  |
| 9                  | 6.8   | 0.0 | 0.0   | 0.0   | 0.1  | 0.0  | 5.0  | 0.0 | 0.0  | 0.0  | 8.6  | 0.0  |
| 10                 | 2.8   | 0.0 | 0.0   | 0.0   | 0.0  | 0.0  | 2.3  | 0.0 | 0.0  | 0.0  | 6.0  | 0.0  |
| 11                 | 0.0   | 0.0 | 0.0   | 1.2   | 0.0  | 0.0  | 0.0  | 0.0 | 0.0  | 0.0  | 7.5  | 4.7  |
| 12                 | 0.0   | 0.0 | 0.0   | 0.0   | 3.5  | 10.0 | 6.5  | 0.0 | 0.0  | 0.1  | 1.3  | 2.0  |
| 13                 | 0.0   | 0.0 | 0.0   | 0.0   | 0.0  | 0.0  | 11.0 | 0.0 | 0.0  | 0.0  | 4.5  | 15.3 |
| 14                 | 0.2   | 0.0 | 0.0   | 2.5   | 0.1  | 0.0  | 0.0  | 0.0 | 3.8  | 0.0  | 0.0  | 0.0  |
| 15                 | 0.0   | 0.0 | 0.0   | 0.0   | 0.0  | 1.0  | 0.0  | 0.0 | 1.5  | 0.7  | 00   | 0.0  |
| 16                 | 0.0   | 0.0 | 0.0   | 0.0   | 0.0  | 0.0  | 0.0  | 0.0 | 0.0  | 0.0  | 1.8  | 0.0  |
| 17                 | 0.0   | 0.0 | 0.0   | 7.2   | 0.3  | 0.0  | 0.0  | 0.0 | 0.0  | 6.6  | 5.5  | 3.2  |
| 18                 | 0.0   | 2.0 | 0.0   | 0.0   | 0.0  | 0.5  | 0.0  | 0.0 | 0.0  | 11.0 | 11.2 | 1.2  |
| 19                 | 0.0   | 0.0 | 0.0   | 0.0   | 0.0  | 0.0  | 4.5  | 0.0 | 0.0  | 00   | 1.0  | 0.0  |
| 20                 | 0.2   | 0.0 | 0.0   | 0.0   | 13.8 | 0.0  | 0.0  | 0.0 | 1.5  | 0.2  | 6.5  | 0.0  |
| 21                 | 0.0   | 0.0 | 0.0   | 0.0   | 0.0  | 0.0  | 0.0  | 0.0 | 0.0  | 0.0  | 0.0  | 9.5  |
| 22                 | 0.0   | 0.0 | 0.0   | 0.0   | 0.0  | 7.2  | 12.4 | 5.0 | 0.0  | 1.2  | 4.5  | 0.2  |
| 23                 | 0.0   | 1.1 | 0.0   | 0.0   | 0.0  | 1.8  | 9.5  | 0.0 | 0.0  | 0.0  | 0.0  | 0.0  |
| 24                 | 5.6   | 0.0 | 0.0   | 0.0   | 0.0  | 0.0  | 0.0  | 0.0 | 0.0  | 0.0  | 0.0  | 0.0  |
| 25                 | 0.0   | 0.0 | 0.0   | 0.0   | 0.0  | 0.0  | 12.5 | 5.0 | 0.0  | 1.0  | 0.0  | 3.0  |
| 26                 | 0.0   | 0.0 | 1.8   | 0.0   | 0.0  | 0.2  | 0.0  | 0.0 | 0.0  | 0.0  | 0.0  | 27.5 |
| 27                 | 0.0   | 0.0 | 5.8   | 0.0   | 0.0  | 0.0  | 0.0  | 0.0 | 0.0  | 0.0  | 0.0  | 4.5  |
| 28                 | 1.8   | 0.0 | 0.0   | 4.4   | 0.0  | 22.2 | 1.0  | 1.0 | 0.4  | 0.0  | 0.0  | 0.0  |
| 29                 | 0.0   | -   | 6.4   | 0.0   | 0.5  | 0.0  | 0.0  | 0.0 | 0.0  | 0.0  | 3.5  | 0.0  |
| 30                 | 0.0   | -   | 0.0   | 0.0   | 0.0  | 0.0  | 0.0  | 0.0 | 0.0  | 0.0  | 2.8  | 0.0  |
| 31                 | 0.0   | -   | 12.8  | -     | 0.0  | -    | 0.0  | 0.0 | -    | 0.0  | -    | 0.0  |

|                        |      |     |      |      |      |      |      |      |      |      |      |      |
|------------------------|------|-----|------|------|------|------|------|------|------|------|------|------|
| <b>Monthly average</b> | 28.5 | 8.8 | 46.0 | 23.4 | 25.4 | 43.0 | 71.0 | 13.0 | 51.2 | 20.8 | 80.8 | 80.4 |
|------------------------|------|-----|------|------|------|------|------|------|------|------|------|------|

**Table S4.** The effect of manure application (M), mineral (Min) fertilization, and M x Min interactions on the content of LMW PAHs, HMW PAHs, and the total content of 16 PAHs in soil.

| <b>Treatment</b>                                               | <b>N<sub>0</sub>P<sub>0</sub>K<sub>0</sub></b> | <b>N<sub>1</sub>P<sub>1</sub>K<sub>1</sub></b> | <b>N<sub>2</sub>P<sub>1</sub>K<sub>1</sub></b> | <b>N<sub>3</sub>P<sub>1</sub>K<sub>1</sub></b> | <b>N<sub>2</sub>P<sub>1</sub>K<sub>2</sub></b> | <b>N<sub>2</sub>P<sub>1</sub>K<sub>3</sub></b> | <b>N<sub>2</sub>P<sub>1</sub>K<sub>2</sub>Mg</b> | <b>N<sub>2</sub>P<sub>1</sub>K<sub>2</sub>MgCa</b> | <b>Mean</b>      |
|----------------------------------------------------------------|------------------------------------------------|------------------------------------------------|------------------------------------------------|------------------------------------------------|------------------------------------------------|------------------------------------------------|--------------------------------------------------|----------------------------------------------------|------------------|
| <b>LMW PAHs</b>                                                |                                                |                                                |                                                |                                                |                                                |                                                |                                                  |                                                    |                  |
| Manure - µg kg <sup>-1</sup><br>(log transformed data)         | 232.9<br>(2.245 <sup>g</sup> )                 | 254.3<br>(2.337 <sup>de</sup> )                | 313.0<br>(2.462 <sup>ab</sup> )                | 326.0<br>(2.453 <sup>b</sup> )                 | 245.0<br>(2.284 <sup>f</sup> )                 | 271.3<br>(2.382 <sup>e</sup> )                 | 241.0<br>(2.317 <sup>e</sup> )                   | 330.2<br>(2.477 <sup>a</sup> )                     | 277.3<br>(2.370) |
| Without manure - µg kg <sup>-1</sup><br>(log transformed data) | 165.6<br>(2.158 <sup>i</sup> )                 | 232.3<br>(2.347 <sup>d</sup> )                 | 243.4<br>(2.361 <sup>cd</sup> )                | 223.2<br>(2.282 <sup>f</sup> )                 | 227.4<br>(2.323 <sup>e</sup> )                 | 201.5<br>(2.193 <sup>b</sup> )                 | 184.3<br>(2.223 <sup>g</sup> )                   | 199.7<br>(2.236 <sup>g</sup> )                     | 209.7<br>(2.265) |
| Mean - µg kg <sup>-1</sup><br>(log transformed data)           | 199.2<br>(2.201 <sup>g</sup> )                 | 243.3<br>(2.342 <sup>e</sup> )                 | 278.2<br>(2.412 <sup>a</sup> )                 | 274.6<br>(2.368 <sup>b</sup> )                 | 238.7<br>(2.304 <sup>d</sup> )                 | 236.4<br>(2.287 <sup>e</sup> )                 | 212.6<br>(2.270 <sup>f</sup> )                   | 265.0<br>(2.357 <sup>b</sup> )                     | -<br>-           |
| <b>HMW PAHs</b>                                                |                                                |                                                |                                                |                                                |                                                |                                                |                                                  |                                                    |                  |
| Manure - µg kg <sup>-1</sup><br>(log transformed data)         | 114.7<br>(2.005 <sup>cd</sup> )                | 92.3<br>(1.882 <sup>f</sup> )                  | 76.8<br>(1.737 <sup>b</sup> )                  | 124.0<br>(2.008 <sup>cd</sup> )                | 75.1<br>(1.811 <sup>g</sup> )                  | 90.9<br>(1.936 <sup>e</sup> )                  | 101.3<br>(2.002 <sup>cd</sup> )                  | 158.4<br>(2.191 <sup>a</sup> )                     | 104.2<br>(1.946) |
| Without manure - µg kg <sup>-1</sup><br>(log transformed data) | 105.8<br>(1.982 <sup>d</sup> )                 | 79.0<br>(1.868 <sup>f</sup> )                  | 108.5<br>(2.027 <sup>e</sup> )                 | 127.3<br>(2.058 <sup>bc</sup> )                | 150.2<br>(2.164 <sup>a</sup> )                 | 89.7<br>(1.938 <sup>e</sup> )                  | 124.1<br>(2.063 <sup>b</sup> )                   | 111.2<br>(2.003 <sup>cd</sup> )                    | 112.0<br>(2.013) |
| Mean - µg kg <sup>-1</sup><br>(log transformed data)           | 110.2<br>(1.993 <sup>e</sup> )                 | 85.7<br>(1.875 <sup>e</sup> )                  | 92.6<br>(1.882 <sup>e</sup> )                  | 125.6<br>(2.033 <sup>b</sup> )                 | 112.6<br>(1.988 <sup>e</sup> )                 | 90.3<br>(1.937 <sup>d</sup> )                  | 112.7<br>(2.032 <sup>b</sup> )                   | 134.8<br>(2.097 <sup>a</sup> )                     | -<br>-           |
| <b>Total (16) PAHs</b>                                         |                                                |                                                |                                                |                                                |                                                |                                                |                                                  |                                                    |                  |
| Manure - µg kg <sup>-1</sup><br>(log transformed data)         | 347.5<br>(2.502 <sup>d</sup> )                 | 346.6<br>(2.486 <sup>de</sup> )                | 389.8<br>(2.562 <sup>e</sup> )                 | 445.0<br>(2.601 <sup>b</sup> )                 | 325.1<br>(2.472 <sup>de</sup> )                | 362.2<br>(2.530 <sup>cd</sup> )                | 342.3<br>(2.504 <sup>d</sup> )                   | 488.6<br>(2.671 <sup>a</sup> )                     | 381.5<br>(2.541) |
| Without manure - µg kg <sup>-1</sup>                           | 271.4                                          | 311.3                                          | 351.9                                          | 350.5                                          | 377.6                                          | 291.2                                          | 308.4                                            | 310.9                                              | 321.6            |

|                              |                       |                        |                        |                        |                        |                        |                       |                       |         |
|------------------------------|-----------------------|------------------------|------------------------|------------------------|------------------------|------------------------|-----------------------|-----------------------|---------|
| (log transformed data        | (2.402 <sup>f</sup> ) | (2.479 <sup>de</sup> ) | (2.530 <sup>cd</sup> ) | (2.487 <sup>de</sup> ) | (2.571 <sup>bc</sup> ) | (2.403 <sup>f</sup> )  | (2.456 <sup>e</sup> ) | (2.456 <sup>e</sup> ) | (2.473) |
| Mean - $\mu\text{g kg}^{-1}$ | 309.4                 | 329.0                  | 370.9                  | 400.2                  | 351.3                  | 326.7                  | 325.3                 | 399.7                 | -       |
| (log transformed data)       | (2.452 <sup>d</sup> ) | (2.483 <sup>e</sup> )  | (2.546 <sup>a</sup> )  | (2.544 <sup>a</sup> )  | (2.521 <sup>b</sup> )  | (2.467 <sup>cd</sup> ) | (2.480 <sup>e</sup> ) | (2.563 <sup>a</sup> ) | -       |

log transformed data marked with the letters a, b, c, d, e, f, g differ significantly at  $p < 0.05$

**Table S5.** The effect of sampling date (D) and the interactions between sampling date (D) and manure (M) fertilization on the content of LMW PAHs, HMW PAHs, and the total content of 16 PAHs in soil.

| Date                                   | April                 | May                   | August                | September             | Mean    |
|----------------------------------------|-----------------------|-----------------------|-----------------------|-----------------------|---------|
| <b>LMW PAHs</b>                        |                       |                       |                       |                       |         |
| Manure - $\mu\text{g kg}^{-1}$         | 318.9                 | 444.8                 | 145.2                 | 200.4                 | 277.3   |
| (log transformed data)                 | (2.429 <sup>e</sup> ) | (2.640 <sup>a</sup> ) | (2.140 <sup>f</sup> ) | (2.270 <sup>e</sup> ) | (2.370) |
| Without manure - $\mu\text{g kg}^{-1}$ | 200.1                 | 324.6                 | 94.5                  | 219.6                 | 209.7   |
| (log transformed data)                 | (2.299 <sup>d</sup> ) | (2.504 <sup>b</sup> ) | (1.950 <sup>g</sup> ) | (2.308 <sup>d</sup> ) | (2.265) |
| Mean - $\mu\text{g kg}^{-1}$           | 259.5                 | 384.7                 | 119.8                 | 210.0                 | -       |
| (log transformed data)                 | (2.364 <sup>b</sup> ) | (2.572 <sup>a</sup> ) | (2.045 <sup>d</sup> ) | (2.289 <sup>e</sup> ) | -       |
| <b>HMW PAHs</b>                        |                       |                       |                       |                       |         |
| Manure - $\mu\text{g kg}^{-1}$         | 81.5                  | 93.6                  | 66.2                  | 175.5                 | 104.2   |
| (log transformed data)                 | (1.837 <sup>g</sup> ) | (1.958 <sup>e</sup> ) | (1.766 <sup>h</sup> ) | (2.225 <sup>a</sup> ) | (1.946) |
| Without manure - $\mu\text{g kg}^{-1}$ | 117.0                 | 106.2                 | 83.7                  | 141.1                 | 112.0   |
| (log transformed data)                 | (2.053 <sup>e</sup> ) | (1.996 <sup>d</sup> ) | (1.885 <sup>f</sup> ) | (2.118 <sup>b</sup> ) | (2.013) |
| Mean - $\mu\text{g kg}^{-1}$           | 99.2                  | 99.9                  | 75.0                  | 158.3                 | -       |
| (log transformed data)                 | (1.945 <sup>e</sup> ) | (1.977 <sup>b</sup> ) | (1.826 <sup>d</sup> ) | (2.171 <sup>a</sup> ) | -       |
| <b>Total (16) PAHs</b>                 |                       |                       |                       |                       |         |
| Manure - $\mu\text{g kg}^{-1}$         | 400.4                 | 538.4                 | 211.4                 | 375.9                 | 381.5   |

|                                        |                       |                       |                       |                       |         |
|----------------------------------------|-----------------------|-----------------------|-----------------------|-----------------------|---------|
| (log transformed data)                 | (2.571 <sup>c</sup> ) | (2.724 <sup>a</sup> ) | (2.311 <sup>f</sup> ) | (2.557 <sup>c</sup> ) | (2.541) |
| Without manure - $\mu\text{g kg}^{-1}$ | 317.0                 | 430.7                 | 178.1                 | 360.7                 | 321.6   |
| (log transformed data)                 | (2.498 <sup>e</sup> ) | (2.627 <sup>b</sup> ) | (2.229 <sup>g</sup> ) | (2.537 <sup>d</sup> ) | (2.473) |
| Mean - $\mu\text{g kg}^{-1}$           | 358.7                 | 484.6                 | 194.8                 | 368.3                 | -       |
| (log transformed data)                 | (2.535 <sup>e</sup> ) | (2.676 <sup>a</sup> ) | (2.270 <sup>d</sup> ) | (2.547 <sup>b</sup> ) | -       |

log transformed data marked with the letters a, b, c, d, e, f, g differ significantly at  $p < 0.05$

**Table S6.** Factor loadings in April, May, August, and September.

| Variable                 | April        |              |              |             | May          |              |              |             | August       |              |              |              | September    |              |             |             |
|--------------------------|--------------|--------------|--------------|-------------|--------------|--------------|--------------|-------------|--------------|--------------|--------------|--------------|--------------|--------------|-------------|-------------|
|                          | PC1          | PC2          | PC3          | PC4         | PC1          | PC2          | PC3          | PC4         | PC1          | PC2          | PC3          | PC4          | PC1          | PC2          | PC3         | PC4         |
| Organotrophic bacteria   | <b>0.85</b>  | -0.47        | -0.04        | -0.05       | -0.28        | <b>-0.74</b> | -0.03        | -0.29       | <b>-0.75</b> | -0.46        | 0.19         | 0.05         | <b>-0.72</b> | -0.32        | 0.01        | 0.13        |
| Ammonifying bacteria     | <b>0.71</b>  | -0.47        | -0.07        | -0.39       | -0.49        | 0.12         | <b>-0.70</b> | -0.06       | 0.15         | -0.45        | -0.22        | 0.38         | <b>-0.67</b> | 0.12         | 0.17        | 0.55        |
| Nitrogen-fixing bacteria | <b>0.69</b>  | -0.47        | -0.19        | -0.35       | -0.49        | 0.17         | <b>-0.71</b> | -0.24       | -0.57        | <b>-0.63</b> | 0.17         | 0.21         | <b>-0.87</b> | -0.14        | 0.07        | 0.22        |
| Actinobacteria           | <b>0.79</b>  | -0.53        | 0.09         | -0.11       | <b>-0.63</b> | -0.02        | <b>-0.65</b> | 0.20        | <b>-0.61</b> | -0.40        | 0.41         | -0.32        | <b>-0.83</b> | -0.12        | 0.24        | 0.17        |
| Fungi                    | 0.57         | -0.41        | -0.34        | -0.23       | -0.37        | -0.15        | -0.51        | <b>0.66</b> | -0.53        | -0.54        | 0.02         | -0.37        | -0.36        | -0.44        | <b>0.67</b> | -0.19       |
| Dehydrogenases           | <b>0.60</b>  | 0.45         | <b>0.60</b>  | -0.09       | <b>-0.85</b> | 0.27         | 0.36         | 0.09        | <b>-0.74</b> | 0.45         | -0.29        | 0.19         | <b>-0.84</b> | 0.19         | -0.21       | -0.27       |
| Catalase                 | <b>0.90</b>  | 0.20         | -0.19        | 0.24        | <b>-0.83</b> | 0.16         | 0.15         | 0.24        | -0.15        | 0.06         | 0.43         | -0.22        | <b>0.60</b>  | 0.04         | -0.28       | -0.48       |
| Urease                   | <b>0.80</b>  | 0.18         | 0.14         | -0.19       | <b>-0.64</b> | 0.21         | -0.13        | -0.39       | <b>-0.90</b> | 0.09         | -0.06        | 0.18         | <b>-0.91</b> | 0.23         | -0.05       | -0.22       |
| Acid phosphatase         | 0.43         | <b>0.61</b>  | -0.48        | -0.13       | <b>-0.77</b> | -0.35        | 0.20         | 0.35        | <b>-0.81</b> | 0.31         | -0.04        | -0.40        | <b>-0.72</b> | 0.22         | 0.35        | -0.36       |
| Alkaline phosphatase     | <b>0.73</b>  | -0.42        | 0.27         | 0.21        | <b>-0.85</b> | 0.36         | 0.11         | -0.18       | <b>-0.88</b> | 0.03         | 0.33         | 0.08         | <b>-0.88</b> | 0.01         | -0.34       | -0.04       |
| C                        | <b>0.79</b>  | 0.54         | -0.06        | -0.17       | <b>-0.85</b> | -0.41        | 0.13         | 0.06        | <b>-0.77</b> | 0.40         | -0.13        | -0.33        | <b>-0.92</b> | 0.08         | 0.13        | -0.23       |
| N                        | <b>0.76</b>  | 0.32         | -0.36        | 0.05        | <b>-0.73</b> | -0.37        | 0.30         | 0.22        | <b>-0.69</b> | 0.35         | 0.19         | -0.17        | <b>-0.82</b> | 0.26         | 0.20        | -0.26       |
| Hh                       | <b>0.60</b>  | -0.14        | <b>-0.71</b> | 0.03        | <b>0.67</b>  | <b>-0.61</b> | -0.06        | 0.23        | <b>0.72</b>  | 0.05         | -0.05        | <b>-0.62</b> | <b>0.71</b>  | 0.05         | <b>0.65</b> | -0.14       |
| pH                       | <b>0.69</b>  | 0.38         | 0.57         | -0.02       | <b>-0.81</b> | 0.49         | 0.12         | -0.16       | <b>-0.91</b> | 0.09         | 0.03         | 0.34         | <b>-0.83</b> | 0.08         | -0.25       | 0.15        |
| LMW PAHs                 | <b>0.74</b>  | 0.16         | -0.35        | 0.49        | -0.49        | <b>-0.75</b> | 0.19         | -0.24       | -0.47        | 0.11         | <b>-0.82</b> | -0.10        | 0.06         | <b>-0.88</b> | 0.10        | 0.03        |
| HMW PAHs                 | 0.07         | <b>-0.60</b> | 0.36         | 0.53        | 0.23         | -0.41        | -0.58        | -0.14       | -0.01        | <b>-0.87</b> | -0.13        | -0.16        | -0.35        | <b>-0.69</b> | -0.34       | -0.24       |
| Total (16) PAHs          | <b>0.70</b>  | -0.04        | -0.21        | <b>0.67</b> | -0.39        | <b>-0.84</b> | -0.01        | -0.27       | -0.38        | -0.48        | <b>-0.73</b> | -0.19        | -0.13        | <b>-0.97</b> | -0.10       | -0.09       |
| Eigenvalues              | 8.22         | 2.84         | 2.15         | 1.52        | 7.04         | 3.38         | 2.41         | 1.27        | 7.16         | 2.88         | 1.95         | 1.43         | 8.58         | 2.75         | 1.59        | 1.15        |
| % explained variance     | <b>48.3%</b> | <b>16.7%</b> | <b>12.7%</b> | <b>8.9%</b> | <b>41.4%</b> | <b>19.9%</b> | <b>14.2%</b> | <b>7.4%</b> | <b>42.1%</b> | <b>17.0%</b> | <b>11.5%</b> | <b>8.3%</b>  | <b>50.5%</b> | <b>16.2%</b> | <b>9.3%</b> | <b>6.7%</b> |
